# Supplementary material
Source: ML conference proceedings conference paper supplement (https://openreview.net/forum?id=WrIrYMCZgbb)
Supplement: supplementary_material [file attachment]

---

# Supplementary Material: Exploiting Semantic Relations for Glass Surface Detection

---

Jiaying Lin\* Yuen-Hei Yeung\* Rynson W. H. Lau

Department of Computer Science

City University of Hong Kong

{jiayinglin5-c, yh.y}@my.cityu.edu.hk, rynson.lau@cityu.edu.hk

In this supplement, we first provide more analysis of our proposed dataset. We also provide more qualitative visual comparisons between existing state-of-the-art methods from relevant fields and our model.

## 1 Dataset Analysis

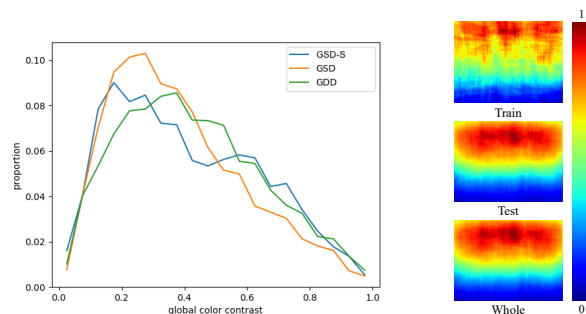

Figure 1: Statistics: (a) Color Contrast, and (b) Mask Location Distribution.

Considering the transparency nature, content inside and outside of the glass should share a high degree of semantic similarity. A lower contrast between regions decreases the saliency of particular areas and avoids causing bias to misguide model training. We measure the color contrast by computing the  $\chi^2$  distance of glass and non-glass regions between RGB histograms. Figure 1a shows results compared among GDD [1] and GSD [2]. In general, the contrast values of GSD-S images concentrate in the lower quartile ( $0 < \text{contrast} < 0.4$ ), which is comparable to GDD and GSD.

The glass location distribution is the average of all glass surface regions in the dataset. The maps in Figure 1b show that glass surfaces mainly concentrate on the top area and are consistent throughout the training and testing split. This also avoids the ‘center bias’ problem due to natural observation tendency.

## 2 More Experimental Results

Figures 2 and 3 show more experimental results of our method, wherein it still outperforms other state-of-the-art methods under challenging scenarios from out-of-distribution outdoor environments. Extensive testings were performed on 13 models altogether, including DeepLabV3+ [3], DPT [4], PSANet [5], PSPNet [6], ViT [7], Twins [8], SegFormer [9], Segmenter [10], DANet [11], SETR [12], Swin [13], GDNet [1] and GlassNet [14].

---

\*Joint first authors.

In Figure 2, rows 1 to 4 show that our method can accurately identify the glass-related objects and consequently localize the glass surfaces. Meanwhile, other models had difficulty recognizing the glass objects in the first place. Rows 5 and 6 show the robustness of GlassSemNet, that even though the glass stairs are saliently apparent, the transparent nature caused itself to blend into the surrounding scene and made it complicated for the other methods to detect. Specifically, the glass railing in row 2 (on the far right) is boundless, which went unnoticed by most models while GlassSemNet was aware of its presence. Rows 4 and 5 are the strong indicators that our model is able to infer the contextual relationships by showing that the humans in row 5 belong to the indoor area inside the building (thereby including them in the glass surface prediction mask). The street light in row 6 belongs to the outdoor area outside of the building (thereby excluding it from the prediction mask).

We can see that GlassSemNet can utilize the semantic context to infer the object relationship, which fosters more cognitive reasoning with contextual inference. Figure 3 continues to demonstrate the effectiveness of GlassSemNet under demanding scenarios.

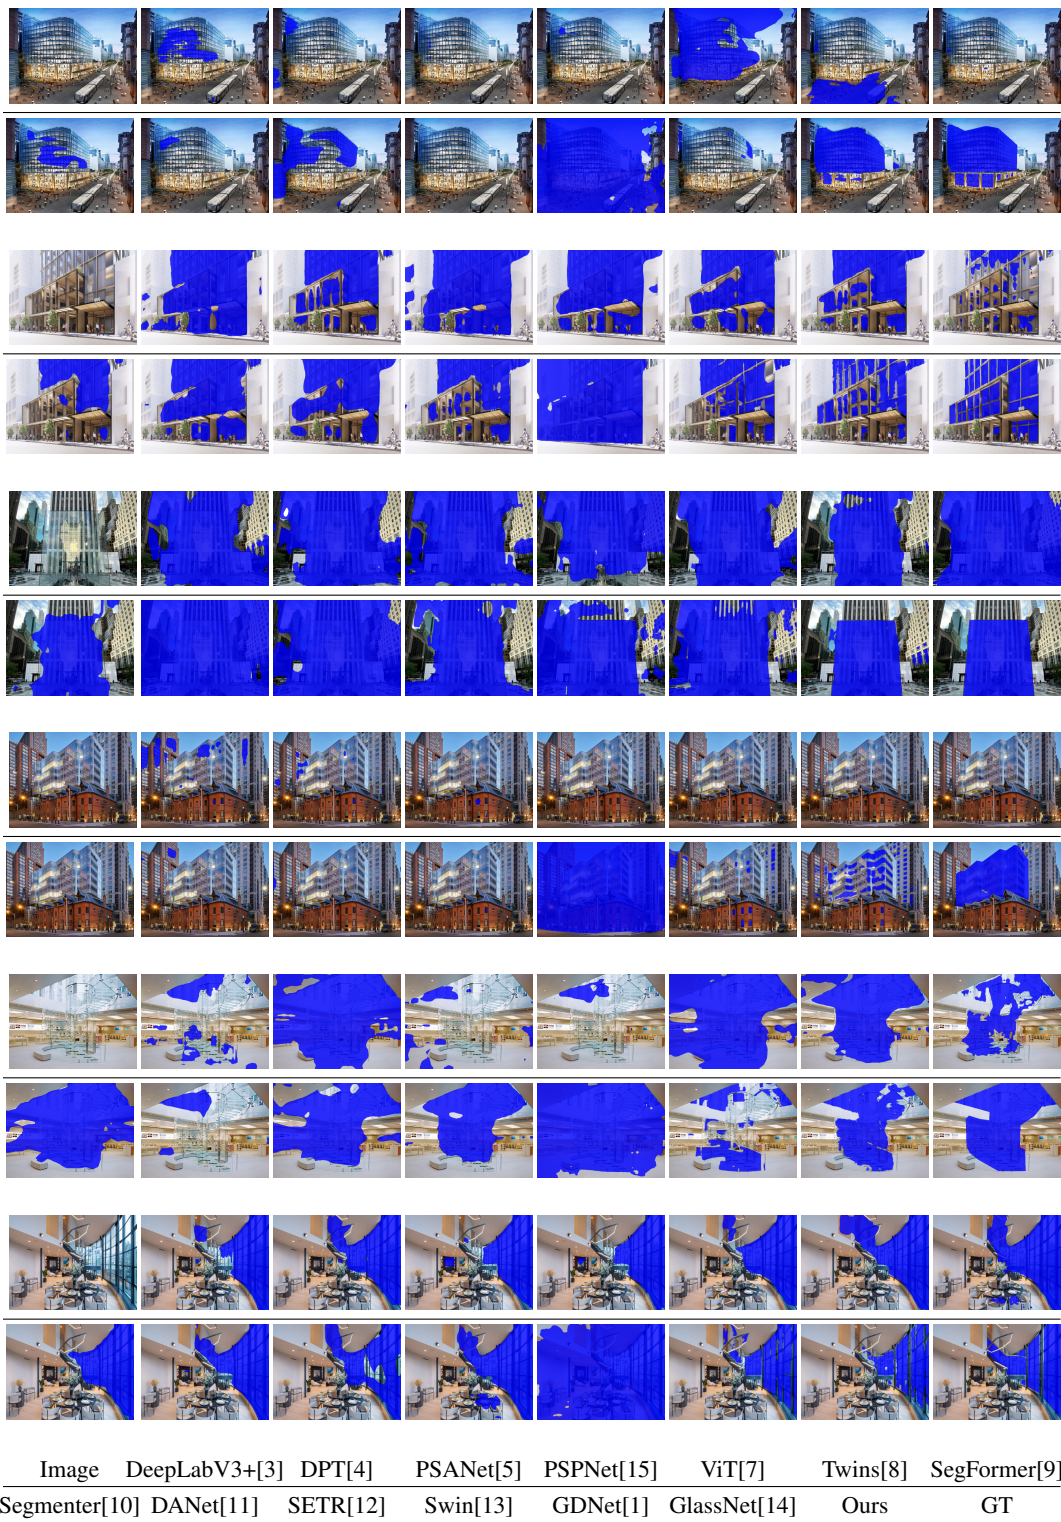

Figure 2: Visual comparisons of our method to the state-of-the-art methods.

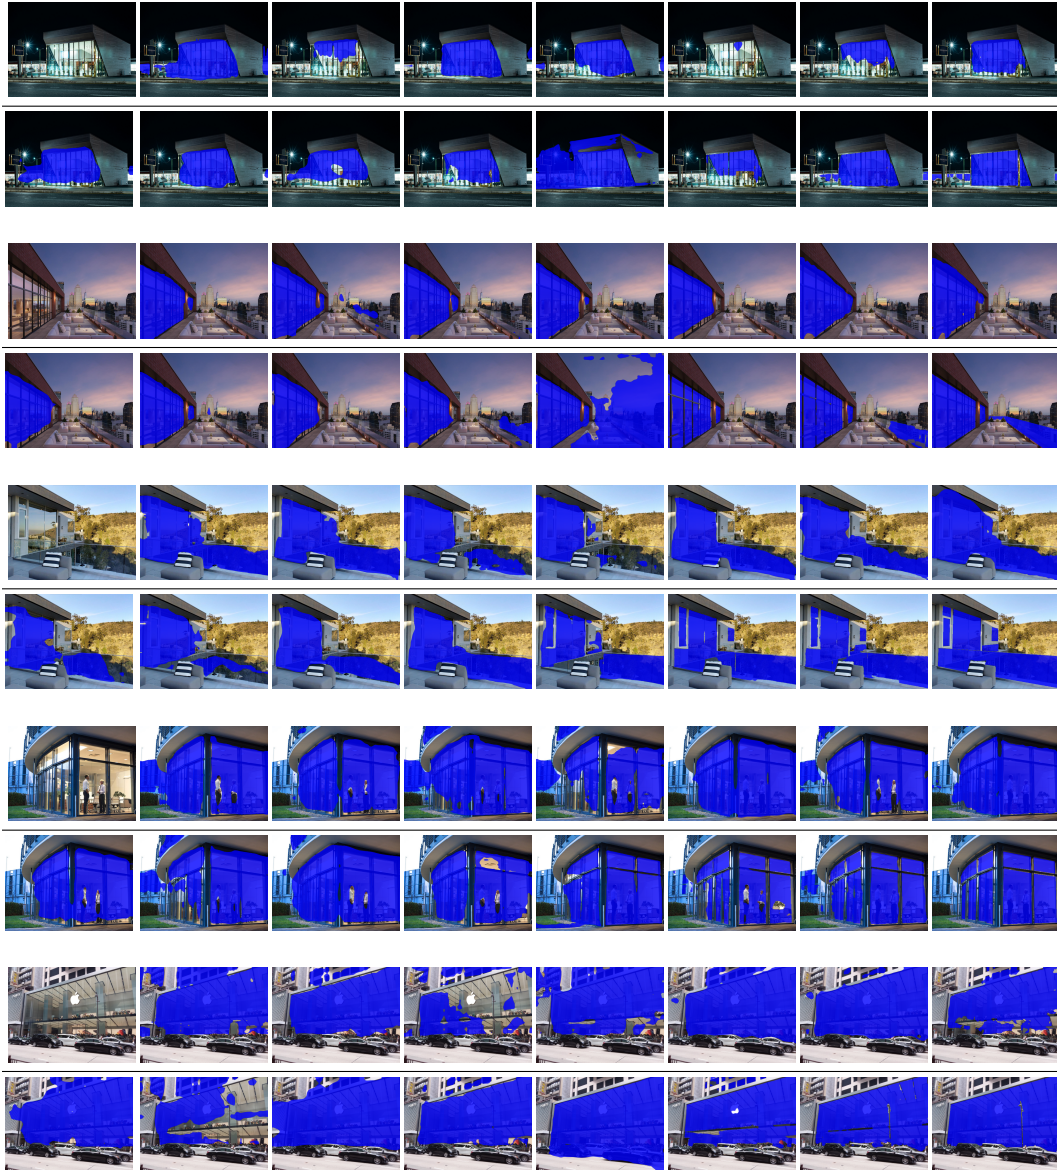

| Image         | DeepLabV3+[3] | DPT[4]   | PSANet[5] | PSPNet[15] | ViT[7]       | Twins[8] | SegFormer[9] |
|---------------|---------------|----------|-----------|------------|--------------|----------|--------------|
| Segmenter[10] | DANet[11]     | SETR[12] | Swin[13]  | GDNet[1]   | GlassNet[14] | Ours     | GT           |

Figure 3: (Cont.) Visual comparisons of our method to the state-of-the-art methods.

## References

- [1] Haiyang Mei, Xin Yang, Yang Wang, Yuanyuan Liu, Shengfeng He, Qiang Zhang, Xiaopeng Wei, and Rynson W.H. Lau. Don't hit me! glass detection in real-world scenes. In *Proceedings of the IEEE/CVF Conference on Computer Vision and Pattern Recognition (CVPR)*, June 2020.
- [2] Jiaying Lin, Zebang He, and Rynson W.H. Lau. Rich context aggregation with reflection prior for glass surface detection. In *CVPR*, 2021.
- [3] Liang-Chieh Chen, George Papandreou, Iasonas Kokkinos, Kevin Murphy, and Alan Yuille. Deeplab: Semantic image segmentation with deep convolutional nets, atrous convolution, and fully connected crfs. *IEEE TPAMI*, 2017.
- [4] René Ranftl, Katrin Lasinger, David Hafner, Konrad Schindler, and Vladlen Koltun. Towards robust monocular depth estimation: Mixing datasets for zero-shot cross-dataset transfer. *IEEE Transactions on Pattern Analysis and Machine Intelligence (TPAMI)*, 2020.
- [5] Hengshuang Zhao, Yi Zhang, Shu Liu, Jianping Shi, Chen Change Loy, Dahua Lin, and Jiaya Jia. PSANet: Point-wise spatial attention network for scene parsing. In *ECCV*, 2018.
- [6] Hengshuang Zhao, Jianping Shi, Xiaojuan Qi, Xiaogang Wang, and Jiaya Jia. Pyramid scene parsing network. In *CVPR*, 2017.
- [7] Li Yuan, Yunpeng Chen, Tao Wang, Weihao Yu, Yujun Shi, Zi-Hang Jiang, Francis E.H. Tay, Jiashi Feng, and Shuicheng Yan. Tokens-to-token vit: Training vision transformers from scratch on imagenet. In *ICCV*, 2021.
- [8] Xiangxiang Chu, Zhi Tian, Yuqing Wang, Bo Zhang, Haibing Ren, Xiaolin Wei, Huaxia Xia, and Chunhua Shen. Twins: Revisiting the design of spatial attention in vision transformers. In *NeurIPS 2021*, 2021.
- [9] Enze Xie, Wenhai Wang, Zhiding Yu, Anima Anandkumar, Jose M. Alvarez, and Ping Luo. Segformer: Simple and efficient design for semantic segmentation with transformers. In M. Ranzato, A. Beygelzimer, Y. Dauphin, P.S. Liang, and J. Wortman Vaughan, editors, *Advances in Neural Information Processing Systems*, volume 34, pages 12077–12090. Curran Associates, Inc., 2021.
- [10] Robin Strudel, Ricardo Garcia, Ivan Laptev, and Cordelia Schmid. Segmenter: Transformer for semantic segmentation. In *Proceedings of the IEEE/CVF International Conference on Computer Vision*, pages 7262–7272, 2021.
- [11] Jun Fu, Jing Liu, Haijie Tian, Yong Li, Yongjun Bao, Zhiwei Fang, and Hanqing Lu. Dual attention network for scene segmentation. In *CVPR*, 2019.
- [12] Sixiao Zheng, Jiachen Lu, Hengshuang Zhao, Xiatian Zhu, Zekun Luo, Yabiao Wang, Yanwei Fu, Jianfeng Feng, Tao Xiang, Philip H.S. Torr, and Li Zhang. Rethinking semantic segmentation from a sequence-to-sequence perspective with transformers. In *CVPR*, 2021.
- [13] Ze Liu, Yutong Lin, Yue Cao, Han Hu, Yixuan Wei, Zheng Zhang, Stephen Lin, and Baining Guo. Swin transformer: Hierarchical vision transformer using shifted windows. In *Proceedings of the IEEE/CVF International Conference on Computer Vision*, pages 10012–10022, 2021.
- [14] Jiaying Lin, Zebang He, and Rynson W.H. Lau. Rich context aggregation with reflection prior for glass surface detection. In *Proceedings of the IEEE/CVF Conference on Computer Vision and Pattern Recognition (CVPR)*, pages 13415–13424, June 2021.
- [15] Hengshuang Zhao, Jianping Shi, Xiaojuan Qi, Xiaogang Wang, and Jiaya Jia. Pyramid scene parsing network. In *CVPR 2017*.
